# Supplementary material
Source: publisher site journal article supplement (https://www.dovepress.com/article/604095)
Supplement: Supplementary file 1 [file 604095%20Supplementary%20Material.docx]

Appendix 1. Pre-Intervention Participant Survey Administered Before the Ultrasound Workshop

| I feel confident using ultrasound in the clinical setting | 1 - Strongly Disagree | 2 - Disagree | 3 - Neutral | 4 - Agree | 5 - Strongly Agree |
| --- | --- | --- | --- | --- | --- |
| Ultrasound should be taught more in medical school | 1 | 2 | 3 | 4 | 5 |
| I feel confident that I would be able to perform an ultrasound-guided IV cannulation on a living person | 1 | 2 | 3 | 4 | 5 |
| I have a clear understanding of the anatomy surrounding peripheral vasculature | 1 | 2 | 3 | 4 | 5 |
| I feel confident identifying vasculature on ultrasound | 1 | 2 | 3 | 4 | 5 |
| I feel confident differentiating between arteries and veins on ultrasound | 1 | 2 | 3 | 4 | 5 |
| I feel confident teaching another student basic ultrasound for vascular access | 1 | 2 | 3 | 4 | 5 |
| I feel comfortable operating an ultrasound machine | 1 | 2 | 3 | 4 | 5 |
| Select the appropriate ultrasound probe for placing a peripheral line | Linear |  | Curvilinear |  | Phased Array |

Appendix 2. Post-Intervention Participant Survey Administered After the Ultrasound Workshop

| The workshop was helpful in improving my understanding of ultrasound | 1 - Strongly Disagree | 2 - Disagree | 3 - Neutral | 4 - Agree | 5 - Strongly Agree |
| --- | --- | --- | --- | --- | --- |
| The workshop was helpful in improving my clinical ultrasound skills | 1 | 2 | 3 | 4 | 5 |
| After the workshop, I feel more confident performing ultrasound-guided procedures | 1 | 2 | 3 | 4 | 5 |
| Ultrasound should be taught more in medical school | 1 | 2 | 3 | 4 | 5 |
| I feel confident using ultrasound in the clinical setting | 1 | 2 | 3 | 4 | 5 |
| I feel confident that I would be able to perform an ultrasound-guided IV cannulation on a living person | 1 | 2 | 3 | 4 | 5 |
| I have a clear understanding of the anatomy surrounding peripheral vasculature | 1 | 2 | 3 | 4 | 5 |
| I feel confident identifying vasculature on ultrasound | 1 | 2 | 3 | 4 | 5 |
| I feel confident differentiating between arteries and veins on ultrasound | 1 | 2 | 3 | 4 | 5 |
| I feel confident teaching another student basic ultrasound for vascular access | 1 | 2 | 3 | 4 | 5 |
| I feel comfortable operating an ultrasound machine | 1 | 2 | 3 | 4 | 5 |
| Select the appropriate ultrasound probe for placing a peripheral line | Linear |  | Curvilinear |  | Phased Array |

| What aspects of the ultrasound workshop did you find helpful? What can be improved? Please share your thoughts below: |
| --- |

Appendix 3. P-UGVA Scoring System

| Preparation of Utensils - preparation of utensils before the procedure | 1  No preparation before the scan | 2 | 3  Incomplete preparation. Unnecessary interruptions during procedure or need for assistance | 4 | 5  Perfect preparation. Procedure performed in smooth workflow |
| --- | --- | --- | --- | --- | --- |
| Ergonomics - Working posture including stabilization of the transducer and the needle. Placement of the apparatus relative to the puncture site. | 1  Working posture and apparatus positioning complicate the procedure unnecessarily. | 2 | 3  Partial optimization of working posture. | 4 | 5  Perfect working posture and positioning of the apparatus. |
| Preparation of the ultrasound device -  Choice of transducer and transducer orientation. Picture optimization: preset, gain, depth, and focus | 1  Incorrect selection and/or orientation of transducer. No image optimization. | 2 | 3  Inconsistent selection and/or orientation of transducer. Incomplete image optimization. | 4 | 5  Correct selection and orientation of transducer. Image optimization performed systematically. |
| Identification of blood vessels -  Distinction of arteries and veins in 2D.  Optimization of vessel filling and transducer pressure. | 1  No regards to distinction between arteries and veins. No optimization of vessel filling. | 2 | 3  Insecure distinction between arteries and veins. Incomplete optimization of vessel filling. | 4 | 5  ​​Perfect distinction between arteries and veins.  Optimization of vessel filling. |
| Anatomy -  Recognition of anatomy and search for blood vessel and puncture site for the procedure | 1  Random approach to location.  Important structures are neglected.  Unsuitable puncture site. | 2 | 3  ​​Partially systematic approach to location of vessels. | 4 | 5  Systematic location of target vessel. Recognition of all important anatomy. Most suitable puncture site. |
| Hygiene -  Performance of the procedure according to current guidelines for hygiene and intravascular procedures | 1  Shows no regards to hygiene. | 2 | 3  Follows guidelines partially. | 4 | 5  Follows guidelines. |
| Coordination of the needle -  Control of the needle tip position and ability to navigate the needle tip through the tissue and into the target vessel | 1  Lack of control and navigation of the needle tip. Misses target vessel. | 2 | 3  Insecure control and navigation of the needle tip. Places needle in target vessel. | 4 | 5  Full control of the needle tip and navigates to perfection. Places needle in target vessel. |
| Completion of the procedure  Ability to complete the procedure and ensure intravascular placing. | 1  Intravascular placement is not ensured. | 2 | 3  Intravascular placement is ensured partially. | 4 | 5  Intravascular placement is ensured correctly. |
